# Supplementary material for: Butylparaben Exposure Induced Darker Skin Pigmentation in Nile Tilapia (Oreochromis niloticus)
Source: MDPI journal article supplement (doi:10.3390/toxics11020119), 2023-01-25
Supplement: s1 [file s1]

# Supplementary Materials: Butylparaben Exposure Induced Darker Skin Pigmentation in Nile Tilapia (*Oreochromis niloticus*)

Song Liu, Nan Zhang, Zhi-fang Liang, Er-chao Li, Yong Wang, Shi-jie Zhang and Ji-liang Zhang \*

**Table S1.** Sequence of primers used in RT-qPCR

| Gene symbol    | Primer  | Primer Sequence (5'-3') |
|----------------|---------|-------------------------|
| <i>β-actin</i> | Forward | TGGCTGAAGGCTACGTCATC    |
|                | Reverse | ACACATAGCTGAACCGCTCC    |
| <i>α-MSH</i>   | Forward | AGGAACCACAGCAAGAGCAG    |
|                | Reverse | GCTGTCCATCAGCTCCAGTT    |
| <i>Asip2</i>   | Forward | GTGAGGCCCAATCCTGTGAA    |
|                | Reverse | CATTGAAGAAGCGGCAGTGG    |
| <i>Rh</i>      | Forward | TCCCTGATGGAGGACCAGTT    |
|                | Reverse | ACGTACACCAGCTTGAAGGG    |
| <i>Opsin</i>   | Forward | ATGCACAGGTGGTGGACTTC    |
|                | Reverse | GAGGCATCGTTTGGGTCCCT    |
| <i>PDE</i>     | Forward | GGGCATCACAGTGCTCAATC    |
|                | Reverse | AGGATGAGTGAAAGCACCCAG   |
| <i>Arr3a</i>   | Forward | CGGAGAGACGGTGGACTCTA    |
|                | Reverse | GTGTCCTCGTCCTTCAGTCG    |
| <i>Arr3b</i>   | Forward | TTGCGGTGTGGACTTTGAGA    |
|                | Reverse | GTTAGCTGGGGCGAAGTGTGTA  |
| <i>Rec</i>     | Forward | TCATGGCTGGAATGACGGAT    |
|                | Reverse | AGGCTTTCTCCAGACGAGAC    |

**Table S2.** Correlation analysis of melanin indexes with ELISA/Genes indexes.

| Melanin Indexes            | ELISA/Genes Indexes | <i>r</i> | <i>p</i> -value |
|----------------------------|---------------------|----------|-----------------|
| Relative area of dark skin | <i>α-MSH</i>        | 0.445    | 0.026           |
| Relative area of dark skin | <i>Asip2</i>        | −0.789   | 0.000           |
| Relative area of dark skin | Tyr                 | 0.510    | 0.009           |
| Relative area of dark skin | DA                  | 0.125    | 0.550           |
| Relative area of dark skin | GABA                | −0.452   | 0.023           |
| Relative area of dark skin | NPY                 | −0.093   | 0.658           |
| Relative area of dark skin | ACH                 | 0.032    | 0.878           |
| Relative area of dark skin | <i>Rh</i>           | 0.277    | 0.179           |
| Relative area of dark skin | <i>Opsin</i>        | −0.813   | 0.000           |
| Relative area of dark skin | <i>PDE</i>          | −0.123   | 0.558           |
| Relative area of dark skin | <i>Arr3a</i>        | 0.787    | 0.000           |
| Relative area of dark skin | <i>Arr3b</i>        | 0.700    | 0.000           |
| Relative area of dark skin | <i>Rec</i>          | −0.143   | 0.495           |
| Melanin content            | <i>α-MSH</i>        | 0.038    | 0.857           |
| Melanin content            | <i>Asip2</i>        | −0.365   | 0.072           |
| Melanin content            | Tyr                 | 0.362    | 0.076           |
| Melanin content            | DA                  | 0.029    | 0.890           |
| Melanin content            | GABA                | −0.348   | 0.088           |
| Melanin content            | NPY                 | 0.122    | 0.560           |
| Melanin content            | ACH                 | 0.217    | 0.298           |
| Melanin content            | <i>Rh</i>           | 0.064    | 0.760           |
| Melanin content            | <i>Opsin</i>        | −0.452   | 0.023           |
| Melanin content            | <i>PDE</i>          | 0.078    | 0.709           |
| Melanin content            | <i>Arr3a</i>        | 0.344    | 0.092           |
| Melanin content            | <i>Arr3b</i>        | 0.422    | 0.036           |
| Melanin content            | <i>Rec</i>          | −0.185   | 0.376           |
| Relative area of melanin   | <i>α-MSH</i>        | 0.510    | 0.009           |
| Relative area of melanin   | <i>Asip2</i>        | −0.774   | 0.000           |
| Relative area of melanin   | Tyr                 | 0.521    | 0.008           |
| Relative area of melanin   | DA                  | 0.127    | 0.545           |
| Relative area of melanin   | GABA                | −0.455   | 0.022           |
| Relative area of melanin   | NPY                 | −0.077   | 0.715           |
| Relative area of melanin   | ACH                 | −0.028   | 0.893           |
| Relative area of melanin   | <i>Rh</i>           | 0.278    | 0.179           |
| Relative area of melanin   | <i>Opsin</i>        | −0.805   | 0.000           |
| Relative area of melanin   | <i>PDE</i>          | −0.137   | 0.515           |
| Relative area of melanin   | <i>Arr3a</i>        | 0.778    | 0.000           |
| Relative area of melanin   | <i>Arr3b</i>        | 0.733    | 0.000           |
| Relative area of melanin   | <i>Rec</i>          | −0.157   | 0.453           |
